# Supplementary material for: Differentiated Service Delivery Models for HIV Treatment in Malawi, South Africa, and Zambia: A Landscape Analysis
Source: PubMed Central journal article supplement (PMC8324204; doi:10.9745/ghsp-d-20-00532), 2021-06-30
Supplement: 20-00532-Rosen-Supplement1.pdf [file 20-00532-Rosen-Supplement1.pdf]

# AMBIT Stakeholder Interview

---

REDCap ID

---

---

1. Instrument ID

---

(Structure should be: AMBIT20XX)

---

2. Interviewer(s) name(s)

---

---

3. Interview date

---

(DD/MM/YYYY)

---

4. Country

- Malawi  
 South Africa  
 Zambia

---

5. Communication mode

- In-person at respondent's offices  
 In-person at HE2RO  
 In-person other  
 Zoom Skype or Telephone

---

6. Time start

---

---

7. Respondent organization name

---

---

8. Respondent organization website

---

---

9. Respondent organization telephone number

---

---

10. Respondent organization address/location

---

---

"Thank you for agreeing to participate in this interview. My name is \_\_\_\_\_ and I am a researcher on the AMBIT project team and I will be interviewing you.

AMBIT stands for ALTERNATIVE MODELS OF ART DELIVERY: OPTIMIZING THE BENEFITS. It is a set of data synthesis, data collection, data analysis, and modeling activities aimed at generating information that can be used by ministries, funders, and other policy makers for near- and long-term decision making. It will also help develop an approach and platform for ongoing evaluation of these alternative models of HIV treatment delivery in the future. Primary data analysis is being conducted in three focus countries in sub-Saharan Africa: Malawi, Zambia, and South Africa. AMBIT is funded by the Bill and Melinda Gates Foundation and is scheduled to run until 2022.

We have contacted you because you are knowledgeable about your organization's involvement in differentiated models of service delivery (DSD) for HIV treatment. As part of the AMBIT project, we are estimating coverage (provision and uptake) of DSD in [country], with descriptions of the models in use, which patient groups are targeted for each of these models, and what data are collected to monitor and/or evaluate these programs. From you we would like to learn more about your organization's involvement in the implementation and support of these models.

Please note that we are not conducting human subjects research at this time. We will not record your identity and will not ask you personal questions or ask for your opinions. We only want to know what your organization is doing in the area of differentiated models of care. Please feel free to decline to answer any question that is asked, or to terminate the interview at any time. We will use your organization's name as we compile a report on DSD coverage in [country]. You will have a chance to review the information we include about your organization before the report is made public."

---

12. Respondent(s) Position (title)

\_\_\_\_\_

---

13. Respondent(s) role in organization's DSD activities (describe)

\_\_\_\_\_

---

14. Respondent(s) number of years involved in HIV treatment delivery activities

\_\_\_\_\_

---

#### RECORDING

To ensure that we do not miss anything you tell us or record anything in accurately, we would like to make an audio recording of this interview. This will only be for purposes of data accuracy, and the recording will be destroyed as soon as we have completed your organization's entry in our data base. We will not ask or record your name or any personal information. If you are not comfortable with having this interview recorded, we will not do so. We can also stop recording at any time during the interview or delete the recording at the end of the interview if you do not wish us to use it to check our information.

---

Do you agree that we can record this interview?

- Yes  
 No

Is your organization currently or was your organization previously involved with any projects involving differentiated models of HIV treatment? These may also have been described as decentralization or task-shifting, or decanting strategies for those on ART. We are interested in any ART delivery strategies that your organization is involved in, including support for what you regard as standard care.

- Yes  
 No

First allow provider to respond. Then inquire about some of the following:

Malawi

- Fast Track Refill (FTR)/ Facility Fast Track (FFF)
- Community Adherence Groups (CAG)
- Multi-Month Scripting (MMS)
- Six-Monthly Appointment Program

Zambia

- Community Adherence Groups (CAGs)
- Urban Adherence Groups (UAGs)
- Fast Track (FT)
- Streamlined ART Initiation (START)
- Mobile ART Delivery Program
- Central Chronic Medicine Dispensing and Distribution (CCMDD)

South Africa

- Fast Track Initiation Counselling (FTIC)
- Enhanced Adherence Counselling (EAC)
- Adherence Club (AC)
- Decentralised Medication Delivery (DMD)
- Central Chronic Medicine Dispensing and Distribution (CCMDD)
- Spaced and Fast Lane Appointment Systems (SFLA)
- Tracing and Retention in Care (TRIC)
- Child and Adolescent Disclosure Counselling (CADC)

Please specify the model or models that are involved in the projects:

- Fast Track Refill (FTR)/ Facility Fast Track (FFF)
- Community Adherence Groups (CAG)
- Multi-Month Scripting (MMS)
- Six-Monthly Appointment Program
- Community Adherence Groups (CAGs)
- Urban Adherence Groups (UAGs)
- Fast Track (FT)
- Streamlined ART Initiation (START)
- Mobile ART Delivery Program
- Central Chronic Medicine Dispensing and Distribution (CCMDD)
- Fast Track Initiation Counselling (FTIC)
- Enhanced Adherence Counselling (EAC)
- Adherence Club (AC)
- Decentralised Medication Delivery (DMD)
- Spaced and Fast Lane Appointment Systems (SFLA)
- Tracing and Retention in Care (TRIC)
- Child and Adolescent Disclosure Counselling (CADC)
- Other

\*\* If other, please specify:

For each delivery model mentioned (including standard care), please describe the following characteristics. Interviewer: start with a detailed narrative description of the model, then fill in the table below. There should be one table for each differentiated model supported by this organization.

---

SECTION 1: TITLE

Q1. What is the title of the project?

---

Q2. What other organizations do you collaborate with on this project, if any?

---

Q3. How is this project funded?

---

Q4. When did the project start, or when it is scheduled to start?

---

(If day is not known, enter 01 for the day.)

Q5. When is the project expected to end, if ending?

- Project has an end date  
 No end date for the project

Q5a. \*\* When is it expected to end?

---

(If day is not known, enter 01 for the day.)

Q6. What is your organization's role in this project?

---

(Direct service delivery (provide staff, infrastructure, etc.), routine monitoring and evaluation, research, training)

---

SECTION 2: MODEL OF CARE

Q7. What is the model of care called?

---

(Include both the organization's label for the model and, if possible, a standard label from the list above.)

Q8. Please describe the model in detail.

---

(Record and take notes on description.)

Q9. What is the model primarily trying to achieve?

- Improved adherence  
 Improved retention  
 VL suppression  
 Decongestion of clinics  
 Cost saving  
 Ensuring confidentiality ( e.g. for key pop. models)  
 Improved psycho-social support  
 Other

Q9a. \*\* If other, please specify

---

SECTION 3: POPULATION ELIGIBLE

Who is the population group eligible for this model?

Q10. HIV treatment status

- Stable  
 Not stable/ detectable viral load  
 Patients with comorbidities  
 Newly initiated  
 Other

Q10a. \*\* If other, please specify

---

Q10b. \*\* If model is for stable patients, how is "stable" defined? (Criteria for eligibility)

---

Q10c. \*\* If model is for unstable patients, how is "unstable" defined (criteria for eligibility)

---

Q11. Ages eligible

- No age eligibility criteria  
 Adults (>18)  
 Adolescents/Youth  
 Children  
 Neonates  
 Other

Q11a. \*\* If adolescents/youth, please specify age range.

---

Q11b. \*\* If children, please specify age range.

---

Q11c. \*\* If other, please specify

---

Q12. Are there any health conditions included in model in addition to ART?

- None  
 TB  
 Non-communicable diseases (hypertension, diabetes)  
 STDs/STIs  
 Reproductive health conditions  
 Antenatal care/ANC/PNC  
 Mental health conditions  
 Other

Q12a. \*\* If other, please specify

---

Q13. Regions/districts included (list names)

---

Q14. Other population characteristics

- No other population characteristics
- Women only
- Men only
- Pregnant women only
- Key populations (MSM, FSW, PWID, young women, adolescents)
- Other

Q14a. \*\* If other, please specify

\_\_\_\_\_

Q14b. \*\* If a key population, specify the population

- Men who have sex with men (MSM)
- Female sex workers (FSW)
- People who inject drugs (PWID)
- Young women
- Transgender
- Children
- Adolescents
- Infants
- Other

Q14c. \*\* If other key population, please specify

\_\_\_\_\_

#### SECTION 4: INTENSITY (WHAT)

Q15. What specific services are provided?

- Clinical consultation
- Drug delivery
- Drug dispensation/refill
- VL testing
- Adherence/retention counseling
- Mental health counseling
- EID diagnosis of HIV
- TB/RIF testing and care
- STI/STD testing care
- PMTCT
- Food assistance
- Health education
- Up-referral
- HIV testing (this may not be relevant)
- Other

Q15a. \*\* If other, please specify

\_\_\_\_\_

Q16. Please note whether any of the above services are integrated with service delivery:

\_\_\_\_\_

#### SECTION 5: LOCATION (WHERE)

Where are the following ART and related services delivered?

Q17. HIV testing

\_\_\_\_\_

(E.g. Facility (specify level), community (specify where), medication pick up point (specify where), household)

---

Q18. ART initiation

\_\_\_\_\_  
 (E.g. Facility (specify level), community (specify where), medication pick up point (specify where), household)

---

Q19. ART medication refills

\_\_\_\_\_  
 (E.g. Facility (specify level), community (specify where), medication pick up point (specify where), household)

---

Q20. Medical monitoring visits

\_\_\_\_\_  
 (E.g. Facility (specify level), community (specify where), medication pick up point (specify where), household)

---

Q21. Blood draw for HIV viral load tests

\_\_\_\_\_  
 (E.g. Facility (specify level), community (specify where), medication pick up point (specify where), household)

---

Q22. Blood draw for HIV CD4 counts (if done)

\_\_\_\_\_  
 (E.g. Facility (specify level), community (specify where), medication pick up point (specify where), household)

---

SECTION 6: FREQUENCY (WHEN)

How often are services provided?

---

Q23. Frequency of interactions with providers.

\_\_\_\_\_  
 (Specify which type of provider, how many times per year)

---

Q24. Minimum number of times patient must come to fixed clinic building per year

\_\_\_\_\_

---

Q25. How many months supply is given per ART dispensation?

\_\_\_\_\_  
 (Note the number of months)

---

SECTION 7: PROVIDER CADRE(S) (WHO)

Who is providing services?

---

Q26. Service delivery sector

\_\_\_\_\_  
 (E.g. Public sector through the government managed public health infrastructure, Partner/NGO programs or services which service the public sector)

Q27. Provider(s) involved

(e.g. Clinician/doctor, nurse, CHW, expert patient, pharmacy staff, lay counselor, lab technician)

(Specify cadre(s) of healthcare workers who deliver services and which services are assigned to each cadre)

---

SECTION 8: OTHER CHARACTERISTICS

Q28. Are there are additional components to the program, either for HIV or non-HIV patients, that have not been mentioned yet?

\_\_\_\_\_

---

SECTION 9: SCALE

Q29. How many patients are enrolled in this model of care?

\_\_\_\_\_

Q30. How does your project define "enrolled"- ever enrolled, utilized at most recent interaction, consistently utilized?

\_\_\_\_\_

Q31. How many patients did the project report in your most recent report?

(Specify patient type if known (e.g. adherent, retained, ever enrolled) )

---

SECTION 10: DATA AND DOCUMENTATION

Q32. Are patient volumes reported by sites verified?

- Yes  
 No

Q33. What kind of information do you collect as you implement the intervention? What measures do you track and how?

\_\_\_\_\_

Q34. Are the patients enrolled in the model registered in an electronic medical record system (Baobab, TIER.Net, Smartcare)?

\_\_\_\_\_

If yes, please specify the EMRS system.

Q35. If yes, does the EMRS capture their participation in this model of care? Specifically, what fields are used to indicate model participation?

\_\_\_\_\_

Q36. If paper patient records are used, do they capture participation in the model? Enrollment only, or at every visit?

\_\_\_\_\_

Q37. Do you manage a specific database with patient-level data for this project, separate from the national EMRS? If so, what fields are in it and is it possible that we could access it (anonymized and with appropriate ethics approval)?

\_\_\_\_\_



Q38. Do you have facility- or community-level aggregate data that you could share with us (e.g. facility survey)?

(Probe- Where and how is this recorded?)

---

#### SECTION 11: EXISTING EVALUATIONS

Q39. What aspects of the project have you or will you evaluate?

- Coverage
- Uptake
- Outcome
- Cost or resource allocation
- Acceptability
- Feasibility
- Other

Q39a. \*\* If other, please specify

\_\_\_\_\_

Q40. How are the outcomes measured?

\_\_\_\_\_

Q41. What data are collected?

\_\_\_\_\_

Q42. What is the frequency of data collection?

\_\_\_\_\_

Q43. How long is the follow up time for outcomes?

\_\_\_\_\_

---

#### SECTION 12: DOCUMENTATION

Q44. Are there any publications, protocols, guidelines, reports, toolkits, M&E plans, presentations, or other documents about this project that you can share with us?

(For each document, ask about whether we can share it outside the AMBIT team)

Q45. Have any mapping exercises been done to illustrate facility-level implementation of DSD and/or patient uptake or coverage? Can we access the results?

\_\_\_\_\_

Q46. Could you share the codebook or data dictionary for any data sets you collect?

\_\_\_\_\_

Q47. Are there blank copies of questionnaires, survey instruments, clinical stationery (file templates), or other data collection instruments you use that could be shared with us?

\_\_\_\_\_

Q48. Are there others in or collaborating with your organization we should interview about other DSD projects or related topics?

\_\_\_\_\_

Q49. Do you have any cost estimates for the model, either from a costing exercise or your own expenditure records?

\_\_\_\_\_

If yes, please specify the type of cost estimates that you have.

### SECTION 13: RESEARCH PROJECTS

Q50. Is this project a research or evaluation study?

- Yes  
 No

Q51. What is the design of the study or evaluation you are conducting?

- Individual-level RCT  
 Cluster RCT  
 Prospective evaluation  
 Retrospective evaluation  
 Cross-sectional  
 Mixed-methods  
 Qualitative  
 Other

Q51a. \*\* If other, please specify

\_\_\_\_\_

Q52. Who is included in the study population?

\_\_\_\_\_  
(E.g. all patients enrolled in model, all patients managed by facility, etc.)

Q53. Is there a comparison group?

- Yes  
 No

Q53a. \*\* If yes, please add details about the comparison group:

\_\_\_\_\_  
(E.g. Control facilities, Pre-post design)

Q54. What time period will your data represent?

\_\_\_\_\_  
(Specify start date and end date if known.)

### SECTION 14: ADDITIONAL INFORMATION

Q55. Is this model recommended in national guidelines for ART delivery? Is it supported by any other implementing partner/organization? If you left would this effort completely stop?

\_\_\_\_\_

Q56. Is the Department or Ministry of Health a partner in implementing this model?

- Yes  
 No

Q56a. \*\* If yes, please specify the DoH or MoH's involvement:

---

Q57. Please make any additional comments on the intervention here. Is there anything about the model or your organization's involvement that we have not addressed yet?

---

#### END SPECIFIC MODEL CHARACTERISTICS

Are there additional projects the partner would like to report on?

- Yes  
 No

#### PROJECT 2: SECTION 1: TITLE

P2 Q1. What is the title of the project?

---

P2 Q2. What other organizations do you collaborate with on this project, if any?

---

P2 Q3. How is this project funded?

---

P2 Q4. When did the project start, or when it is scheduled to start?

---

(If day is not known, enter 01 for the day.)

P2 Q5. When is the project expected to end, if ending?

- Project has an end date  
 No end date for the project

P2 Q5a. \*\* When is it expected to end?

---

(If day is not known, enter 01 for the day.)

P2 Q6. What is your organization's role in this project?

---

(Direct service delivery (provide staff, infrastructure, etc.), routine monitoring and evaluation, research, training)

#### PROJECT 2: SECTION 2: MODEL OF CARE

P2 Q7. What is the model of care called?

---

(Include both the organization's label for the model and, if possible, a standard label from the list above.)

P2 Q8. Please describe the model in detail.

---

(Record and take notes on description.)

P2 Q9. What is the model primarily trying to achieve?

- Improved adherence
- Improved retention
- VL suppression
- Decongestion of clinics
- Cost saving
- Ensuring confidentiality ( e.g. for key pop. models)
- Improved psycho-social support
- Other

P2 Q9a. \*\* If other, please specify

\_\_\_\_\_

PROJECT 2: SECTION 3: POPULATION ELIGIBLE

Who is the population group eligible for this model?

P2 Q10. HIV treatment status

- Stable
- Not stable/ detectable viral load
- Patients with comorbidities
- Newly initiated
- Other

P2 Q10a. \*\* If other, please specify

\_\_\_\_\_

P2 Q10b. \*\* If model is for stable patients, how is "stable" defined? (Criteria for eligibility)

\_\_\_\_\_

P2 Q10c. \*\* If model is for unstable patients, how is "unstable" defined (criteria for eligibility)

\_\_\_\_\_

P2 Q11. Ages eligible

- No age eligibility criteria
- Adults (>18)
- Adolescents/Youth
- Children
- Neonates
- Other

P2 Q11a. \*\* If adolescents/youth, please specify age range.

\_\_\_\_\_

P2 Q11b. \*\* If children, please specify age range.

\_\_\_\_\_

P2 Q11c. \*\* If other, please specify

\_\_\_\_\_

P2 Q12. Are there any health conditions included in model in addition to ART?

- None
- TB
- Non-communicable diseases (hypertension, diabetes)
- STDs/STIs
- Reproductive health conditions
- Antenatal care/ANC/PNC
- Mental health conditions
- Other

---

P2 Q12a. \*\* If other, please specify

---



---

P2 Q13. Regions/districts included (list names)

---



---

P2 Q14. Other population characteristics

- No other population characteristics
  - Women only
  - Men only
  - Pregnant women only
  - Key populations (MSM, FSW, PWID, young women, adolescents)
  - Other
- 

P2 Q14a. \*\* If other, please specify

---



---

P2 Q14b. \*\* If a key population, specify the population

- Men who have sex with men (MSM)
  - Female sex workers (FSW)
  - People who inject drugs (PWID)
  - Young women
  - Transgender
  - Children
  - Adolescents
  - Infants
  - Other
- 

P2 Q14c. \*\* If other key population, please specify

---



---

PROJECT 2: SECTION 4: INTENSITY (WHAT)

---

P2 Q15. What specific services are provided?

- Clinical consultation
  - Drug delivery
  - Drug dispensation/refill
  - VL testing
  - Adherence/retention counseling
  - Mental health counseling
  - EID diagnosis of HIV
  - TB/RIF testing and care
  - STI/STD testing care
  - PMTCT
  - Food assistance
  - Health education
  - Up-referral
  - HIV testing (this may not be relevant)
  - Other
- 

P2 Q15a. \*\* If other, please specify

---



---

P2 Q16. Please note whether any of the above services are integrated with service delivery:

---



---

PROJECT 2: SECTION 5: LOCATION (WHERE)

Where are the following ART and related services delivered?

---

P2 Q17. HIV testing

\_\_\_\_\_  
 (E.g. Facility (specify level), community (specify where), medication pick up point (specify where), household)

---

P2 Q18. ART initiation

\_\_\_\_\_  
 (E.g. Facility (specify level), community (specify where), medication pick up point (specify where), household)

---

P2 Q19. ART medication refills

\_\_\_\_\_  
 (E.g. Facility (specify level), community (specify where), medication pick up point (specify where), household)

---

P2 Q20. Medical monitoring visits

\_\_\_\_\_  
 (E.g. Facility (specify level), community (specify where), medication pick up point (specify where), household)

---

P2 Q21. Blood draw for HIV viral load tests

\_\_\_\_\_  
 (E.g. Facility (specify level), community (specify where), medication pick up point (specify where), household)

---

P2 Q22. Blood draw for HIV CD4 counts (if done)

\_\_\_\_\_  
 (E.g. Facility (specify level), community (specify where), medication pick up point (specify where), household)

---

**PROJECT 2: SECTION 6: FREQUENCY (WHEN)**

How often are services provided?

---

P2 Q23. Frequency of interactions with providers.

\_\_\_\_\_  
 (Specify which type of provider, how many times per year)

---

P2 Q24. Minimum number of times patient must come to fixed clinic building per year

\_\_\_\_\_

---

P2 Q25. How many months supply is given per ART dispensation?

\_\_\_\_\_  
 (Note the number of months)

---

**PROJECT 2: SECTION 7: PROVIDER CADRE(S) (WHO)**

Who is providing services?

P2 Q26. Service delivery sector

(E.g. Public sector through the government managed public health infrastructure, Partner/NGO programs or services which service the public sector)

P2 Q27. Provider(s) involved

(e.g. Clinician/doctor, nurse, CHW, expert patient, pharmacy staff, lay counselor, lab technician)

(Specify cadre(s) of healthcare workers who deliver services and which services are assigned to each cadre)

PROJECT 2: SECTION 8: OTHER CHARACTERISTICS

P2 Q28. Are there are additional components to the program, either for HIV or non-HIV patients, that have not been mentioned yet?

\_\_\_\_\_

PROJECT 2: SECTION 9: SCALE

P2 Q29. How many patients are enrolled in this model of care?

\_\_\_\_\_

P2 Q30. How does your project define "enrolled"- ever enrolled, utilized at most recent interaction, consistently utilized?

\_\_\_\_\_

P2 Q31. How many patients did the project report in your most recent report?

(Specify patient type if known (e.g. adherent, retained, ever enrolled) )

PROJECT 2: SECTION 10: DATA AND DOCUMENTATION

P2 Q32. Are patient volumes reported by sites verified?

Yes  
 No

P2 Q33. What kind of information do you collect as you implement the intervention? What measures do you track and how?

\_\_\_\_\_

P2 Q34. Are the patients enrolled in the model registered in an electronic medical record system (Baobab, TIER.Net, Smartcare)?

\_\_\_\_\_

If yes, please specify the EMRS system.

P2 Q35. If yes, does the EMRS capture their participation in this model of care? Specifically, what fields are used to indicate model participation?

\_\_\_\_\_

P2 Q36. If paper patient records are used, do they capture patient participation in the model? Enrollment only, or at every visit?

\_\_\_\_\_

P2 Q37. Do you manage a specific database with patient-level data for this project, separate from the national EMRS? If so, what fields are in it and is it possible that we could access it (anonymized and with appropriate ethics approval)?

\_\_\_\_\_

P2 Q38. Do you have facility- or community-level aggregate data that you could share with us (e.g. facility survey)?

\_\_\_\_\_ (Probe- Where and how is this recorded?)

## PROJECT 2: SECTION 11: EXISTING EVALUATIONS

P2 Q39. What aspects of the project have you or will you evaluate?

- Coverage
- Uptake
- Outcome
- Cost or resource allocation
- Acceptability
- Feasibility
- Other

P2 Q39a. \*\* If other, please specify

\_\_\_\_\_

P2 Q40. How are the outcomes measured?

\_\_\_\_\_

P2 Q41. What data are collected?

\_\_\_\_\_

P2 Q42. What is the frequency of data collection?

\_\_\_\_\_

P2 Q43. How long is the follow up time for outcomes?

\_\_\_\_\_

## PROJECT 2: SECTION 12: DOCUMENTATION

P2 Q44. Are there any publications, protocols, guidelines, reports, toolkits, M&E plans, presentations, or other documents about this project that you can share with us?

\_\_\_\_\_ (For each document, ask about whether we can share it outside the AMBIT team)

P2 Q45. Have any mapping exercises been done to illustrate facility-level implementation of DSD and/or patient uptake or coverage? Can we access the results?

\_\_\_\_\_

P2 Q46. Could you share the codebook or data dictionary for any data sets you collect?

\_\_\_\_\_



P2 Q47. Are there blank copies of questionnaires, survey instruments, clinical stationery (file templates), or other data collection instruments you use that could be shared with us?

---

P2 Q48. Are there others in or collaborating with your organization we should interview about other DSD projects or related topics?

---

P2 Q49. Do you have any cost estimates for the model, either from a costing exercise or your own expenditure records?

---

If yes, please specify the type of cost estimates that you have.

---

## PROJECT 2: SECTION 13: RESEARCH PROJECTS

P2 Q50. Is this project a research or evaluation study?

- Yes  
 No

P2 Q51. What is the design of the study or evaluation you are conducting?

- Individual-level RCT  
 Cluster RCT  
 Prospective evaluation  
 Retrospective evaluation  
 Cross-sectional  
 Mixed-methods  
 Qualitative  
 Other

P2 Q51a. \*\* If other, please specify

---

P2 Q52. Who is included in the study population?

(E.g. all patients enrolled in model, all patients managed by facility, etc.)

P2 Q53. Is there a comparison group?

- Yes  
 No

P2 Q53a. \*\* If yes, please add details about the comparison group:

(E.g. Control facilities, Pre-post design)

P2 Q54. What time period will your data represent?

(Specify start date and end date if known.)

---

## PROJECT 2: SECTION 14: ADDITIONAL INFORMATION

P2 Q55. Is this model recommended in national guidelines for ART delivery? Is it supported by any other implementing partner/organization? If you left would this effort completely stop?

---

P2 Q56. Is the Department or Ministry of Health a partner in implementing this model?

- Yes  
 No

P2 Q56a. \*\* If yes, please specify the DoH or MoH's involvement:

\_\_\_\_\_

P2 Q57. Please make any additional comments on the intervention here. Is there anything about the model or your organization's involvement that we have not addressed yet?

\_\_\_\_\_

#### END SPECIFIC MODEL CHARACTERISTICS

Are there additional projects the partner would like to report on?

- Yes  
 No

#### PROJECT 3: SECTION 1: TITLE

P3 Q1. What is the title of the project?

\_\_\_\_\_

P3 Q2. What other organizations do you collaborate with on this project, if any?

\_\_\_\_\_

P3 Q3. How is this project funded?

\_\_\_\_\_

P3 Q4. When did the project start, or when it is scheduled to start?

\_\_\_\_\_  
(If day is not known, enter 01 for the day.)

P3 Q5. When is the project expected to end, if ending?

- Project has an end date  
 No end date for the project

P3 Q5a. \*\* When is it expected to end?

\_\_\_\_\_  
(If day is not known, enter 01 for the day.)

P3 Q6. What is your organization's role in this project?

\_\_\_\_\_  
(Direct service delivery (provide staff, infrastructure, etc.), routine monitoring and evaluation, research, training)

#### PROJECT 3: SECTION 2: MODEL OF CARE

P3 Q7. What is the model of care called?

\_\_\_\_\_  
(Include both the organization's label for the model and, if possible, a standard label from the list above.)

P3 Q8. Please describe the model in detail.

(Record and take notes on description.)

P3 Q9. What is the model primarily trying to achieve?

- Improved adherence
- Improved retention
- VL suppression
- Decongestion of clinics
- Cost saving
- Ensuring confidentiality ( e.g. for key pop. models)
- Improved psycho-social support
- Other

P3 Q9a. \*\* If other, please specify

PROJECT 3: SECTION 3: POPULATION ELIGIBLE

Who is the population group eligible for this model?

P3 Q10. HIV treatment status

- Stable
- Not stable/ detectable viral load
- Patients with comorbidities
- Newly initiated
- Other

P3 Q10a. \*\* If other, please specify

P3 Q10b. \*\* If model is for stable patients, how is "stable" defined? (Criteria for eligibility)

P3 Q10c. \*\* If model is for unstable patients, how is "unstable" defined (criteria for eligibility)

P3 Q11. Ages eligible

- No age eligibility criteria
- Adults (>18)
- Adolescents/Youth
- Children
- Neonates
- Other

P3 Q11a. \*\* If adolescents/youth, please specify age range.

P3 Q11b. \*\* If children, please specify age range.

P3 Q11c. \*\* If other, please specify

P3 Q12. Are there any health conditions included in model in addition to ART?

- None
- TB
- Non-communicable diseases (hypertension, diabetes)
- STDs/STIs
- Reproductive health conditions
- Antenatal care/ANC/PNC
- Mental health conditions
- Other

P3 Q12a. \*\* If other, please specify

---

P3 Q13. Regions/districts included (list names)

---

P3 Q14. Other population characteristics

- No other population characteristics
- Women only
- Men only
- Pregnant women only
- Key populations (MSM, FSW, PWID, young women, adolescents)
- Other

P3 Q14a. \*\* If other, please specify

---

P3 Q14b. \*\* If a key population, specify the population

- Men who have sex with men (MSM)
- Female sex workers (FSW)
- People who inject drugs (PWID)
- Young women
- Transgender
- Children
- Adolescents
- Infants
- Other

P3 Q14c. \*\* If other key population, please specify

---

#### PROJECT 3: SECTION 4: INTENSITY (WHAT)

P3 Q15. What specific services are provided?

- Clinical consultation
- Drug delivery
- Drug dispensation/refill
- VL testing
- Adherence/retention counseling
- Mental health counseling
- EID diagnosis of HIV
- TB/RIF testing and care
- STI/STD testing care
- PMTCT
- Food assistance
- Health education
- Up-referral
- HIV testing (this may not be relevant)
- Other

P3 Q15a. \*\* If other, please specify

---

---

P3 Q16. Please note whether any of the above services are integrated with service delivery:

---



---

PROJECT 3: SECTION 5: LOCATION (WHERE)

Where are the following ART and related services delivered?

---

P3 Q17. HIV testing

---

(E.g. Facility (specify level), community (specify where), medication pick up point (specify where), household)

---

P3 Q18. ART initiation

---

(E.g. Facility (specify level), community (specify where), medication pick up point (specify where), household)

---

P3 Q19. ART medication refills

---

(E.g. Facility (specify level), community (specify where), medication pick up point (specify where), household)

---

P3 Q20. Medical monitoring visits

---

(E.g. Facility (specify level), community (specify where), medication pick up point (specify where), household)

---

P3 Q21. Blood draw for HIV viral load tests

---

(E.g. Facility (specify level), community (specify where), medication pick up point (specify where), household)

---

P3 Q22. Blood draw for HIV CD4 counts (if done)

---

(E.g. Facility (specify level), community (specify where), medication pick up point (specify where), household)

---



---

PROJECT 3: SECTION 6: FREQUENCY (WHEN)

How often are services provided?

---

P3 Q23. Frequency of interactions with providers.

---

(Specify which type of provider, how many times per year)

---

P3 Q24. Minimum number of times patient must come to fixed clinic building per year

---

P3 Q25. How many months supply is given per ART dispensation?

---

(Note the number of months)

---

---

PROJECT 3: SECTION 7: PROVIDER CADRE(S) (WHO)  
Who is providing services?

---

P3 Q26. Service delivery sector

\_\_\_\_\_  
(E.g. Public sector through the government managed public health infrastructure, Partner/NGO programs or services which service the public sector)

---

P3 Q27. Provider(s) involved

(e.g. Clinician/doctor, nurse, CHW, expert patient, pharmacy staff, lay counselor, lab technician)

\_\_\_\_\_  
(Specify cadre(s) of healthcare workers who deliver services and which services are assigned to each cadre)

---

PROJECT 3: SECTION 8: OTHER CHARACTERISTICS

---

P3 Q28. Are there are additional components to the program, either for HIV or non-HIV patients, that have not been mentioned yet?

\_\_\_\_\_

---

PROJECT 3: SECTION 9: SCALE

---

P3 Q29. How many patients are enrolled in this model of care?

\_\_\_\_\_

---

P3 Q30. How does your project define "enrolled"- ever enrolled, utilized at most recent interaction, consistently utilized?

\_\_\_\_\_

---

P3 Q31. How many patients did the project report in your most recent report?

\_\_\_\_\_  
(Specify patient type if known (e.g. adherent, retained, ever enrolled) )

---

PROJECT 3: SECTION 10: DATA AND DOCUMENTATION

---

P3 Q32. Are patient volumes reported by sites verified?

Yes  
 No

---

P3 Q33. What kind of information do you collect as you implement the intervention? What measures do you track and how?

\_\_\_\_\_

---

P3 Q34. Are the patients enrolled in the model registered in an electronic medical record system (Baobab, TIER.Net, Smartcare)?

\_\_\_\_\_

If yes, please specify the EMRS system.

---

P3 Q35. If yes, does the EMRS capture their participation in this model of care? Specifically, what fields are used to indicate model participation?

\_\_\_\_\_

---

P3 Q36. If paper patient records are used, do they capture patient participation in the model? Enrollment only, or at every visit?

---

P3 Q37. Do you manage a specific database with patient-level data for this project, separate from the national EMRS? If so, what fields are in it and is it possible that we could access it (anonymized and with appropriate ethics approval)?

---

P3 Q38. Do you have facility- or community-level aggregate data that you could share with us (e.g. facility survey)?

(Probe- Where and how is this recorded?)

---

### PROJECT 3: SECTION 11: EXISTING EVALUATIONS

---

P3 Q39. What aspects of the project have you or will you evaluate?

- Coverage
  - Uptake
  - Outcome
  - Cost or resource allocation
  - Acceptability
  - Feasibility
  - Other
- 

P3 Q39a. \*\* If other, please specify

---

P3 Q40. How are the outcomes measured?

---

P3 Q41. What data are collected?

---

P3 Q42. What is the frequency of data collection?

---

P3 Q43. How long is the follow up time for outcomes?

---

### PROJECT 3: SECTION 12: DOCUMENTATION

---

P3 Q44. Are there any publications, protocols, guidelines, reports, toolkits, M&E plans, presentations, or other documents about this project that you can share with us?

(For each document, ask about whether we can share it outside the AMBIT team)

---

P3 Q45. Have any mapping exercises been done to illustrate facility-level implementation of DSD and/or patient uptake or coverage? Can we access the results?

---

P3 Q46. Could you share the codebook or data dictionary for any data sets you collect?

---

P3 Q47. Are there blank copies of questionnaires, survey instruments, clinical stationery (file templates), or other data collection instruments you use that could be shared with us?

---

P3 Q48. Are there others in or collaborating with your organization we should interview about other DSD projects or related topics?

---

P3 Q49. Do you have any cost estimates for the model, either from a costing exercise or your own expenditure records?

---

If yes, please specify the type of cost estimates that you have.

---

### PROJECT 3: SECTION 13: RESEARCH PROJECTS

---

P3 Q50. Is this project a research or evaluation study?

- Yes  
 No

P3 Q51. What is the design of the study or evaluation you are conducting?

- Individual-level RCT  
 Cluster RCT  
 Prospective evaluation  
 Retrospective evaluation  
 Cross-sectional  
 Mixed-methods  
 Qualitative  
 Other

P3 Q51a. \*\* If other, please specify

---

P3 Q52. Who is included in the study population?

(E.g. all patients enrolled in model, all patients managed by facility, etc.)

---

P3 Q53. Is there a comparison group?

- Yes  
 No

P3 Q53a. \*\* If yes, please add details about the comparison group:

(E.g. Control facilities, Pre-post design)

---

P3 Q54. What time period will your data represent?

(Specify start date and end date if known.)

---

### PROJECT 3: SECTION 14: ADDITIONAL INFORMATION



P3 Q55. Is this model recommended in national guidelines for ART delivery? Is it supported by any other implementing partner/organization? If you left would this effort completely stop?

\_\_\_\_\_

P3 Q56. Is the Department or Ministry of Health a partner in implementing this model?

Yes  
 No

P3 Q56a. \*\* If yes, please specify the DoH or MoH's involvement:

\_\_\_\_\_

P3 Q57. Please make any additional comments on the intervention here. Is there anything about the model or your organization's involvement that we have not addressed yet?

\_\_\_\_\_

#### END SPECIFIC MODEL CHARACTERISTICS

16. Does the organization have any plans for future projects or programs, beyond those that we have already discussed, that include differentiated models of care? What and where will these be implemented? Can we use this information in describing what to anticipate in DSD development in the future?

\_\_\_\_\_

17. We have created a list of relevant stakeholders and databases that we plan to use to document the work that is being done on differentiated care. Would you be willing to review our stakeholder and database list for [country] and provide input or information you think we may have missed? If you agree, we will send the list to you shortly by e-mail.

Yes  
 No

17a. Confirm email address:

\_\_\_\_\_

18. Is there anything else you'd like to tell me before we finish?

\_\_\_\_\_

19. Confirm decision about recording this interview and sharing documents.

Yes  
 No

Confirmed?

20. Confirm response about the possibility of accessing organization's site- or patient-level data in the future.

Yes  
 No

Confirmed?

21. Confirm decision about review of stakeholder and data set lists and record respondent's e-mail address.

Yes  
 No

Confirmed?

---

22. Can we contact the respondent(s) again if we have further questions or to clarify the information we've received?

- Yes
- No

---

THANK RESPONDENT(S) FOR THEIR TIME AND ASSISTANCE.

---

Record time interview ended \_\_\_\_\_.

\_\_\_\_\_

---

Please note any additional comments on the interview.

\_\_\_\_\_
