# Supplementary material for: Differentiated Service Delivery Models for HIV Treatment in Malawi, South Africa, and Zambia: A Landscape Analysis
Source: PubMed Central journal article supplement (PMC8324204; doi:10.9745/ghsp-d-20-00532), 2021-06-30
Supplement: 20-00532-Rosen-Supplement2.pdf [file 20-00532-Rosen-Supplement2.pdf]

## Supplement 2. Differentiated Service Delivery Model Domains

| Domain              | Question asked                                                              | Definition                                                                                                                                                                                                                                                    |
|---------------------|-----------------------------------------------------------------------------|---------------------------------------------------------------------------------------------------------------------------------------------------------------------------------------------------------------------------------------------------------------|
| Population          | Who does the model serve?                                                   | Population is categorized by patient ART status (stable, newly initiated, not stable) and by age (child, adolescent, adult); occasionally also by vulnerability group (general, men who have sex with men (MSM), adolescents etc.).                           |
| Location            | Is care provided in the clinic or off-site?                                 | Location is categorized as 1) receiving all services at a fixed health care facility, 2) receiving all services outside of health care facility; or 3) mixed, receiving some services in each location.                                                       |
| Frequency           | How often does the patient interact with a healthcare provider or facility? | Number of unique times a client receives any service per 12-month period. For example, a client receiving a combined clinical consultation and drug pickup at the same place on the same day every 3 months has a frequency of 4.                             |
| Dispensing interval | How many months of medications are dispensed?                               | Number of months of ARV medications provided at each interaction with the healthcare system. This indicator measures dispensing, not prescribing (e.g. a six-month prescription delivered twice, in three-month quantities each, has a three month duration). |
| Provider            | Which cadres of clinical and/or lay staff provide the services?             | Potential cadres include doctors, nurses, lay counselors, community health workers, pharmacists, and others designated within the models.                                                                                                                     |

Adapted from: Duncombe C, Rosenblum S, Hellmann N, et al. Reframing HIV care: putting people at the centre of antiretroviral delivery. *Trop Med Int Health.* 2015;20(4):430-447.
